# Supplementary material
Source: PubMed Central journal article supplement (PMC7818381)
Supplement: NIHMS1658706-supplement-Supp_Figures.pdf [file NIHMS1658706-supplement-Supp_Figures.pdf]

## SUPPLEMENTARY MATERIAL

### Supplementary Figure 1.

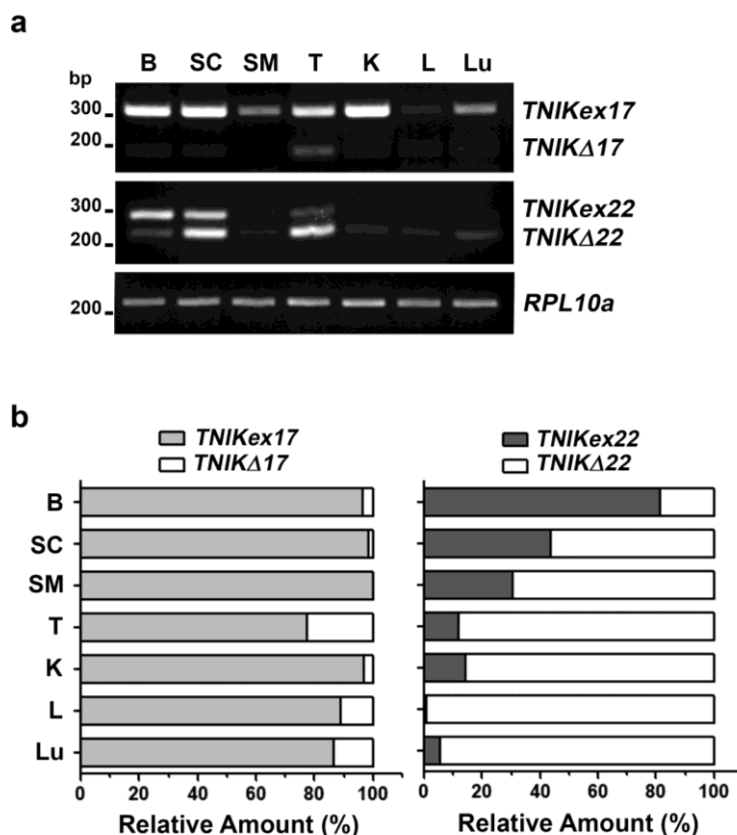

#### Analysis of *TNIK* exon 17 and 22 alternative splicing in human adult tissues.

**a)** Semi-quantitative RT-PCR analysis of the *TNIK* exon 17 (*upper panel*) and exon 22 (*middle panel*) alternative splicing in the indicated tissues (B: brain; SP: spinal cord; SM: skeletal muscle; T: testis; K: kidney; L: liver; Lu: lung). For both alternative splicing events, the upper band indicates exon inclusion (*TNIKex17* or *TNIKex22* isoforms), while the lower band represents exon skipping (*TNIKΔ17* or *TNIKΔ22* isoforms). *RPL10a* was used for sample normalization. **b)** Densitometric analysis representing the relative amount of *TNIKex17* and *TNIKΔ17* (*left panel*) and of *TNIKex22* and *TNIKΔ22* (*right panel*) isoforms in the analysed tissues.

## Supplementary Figure 2.

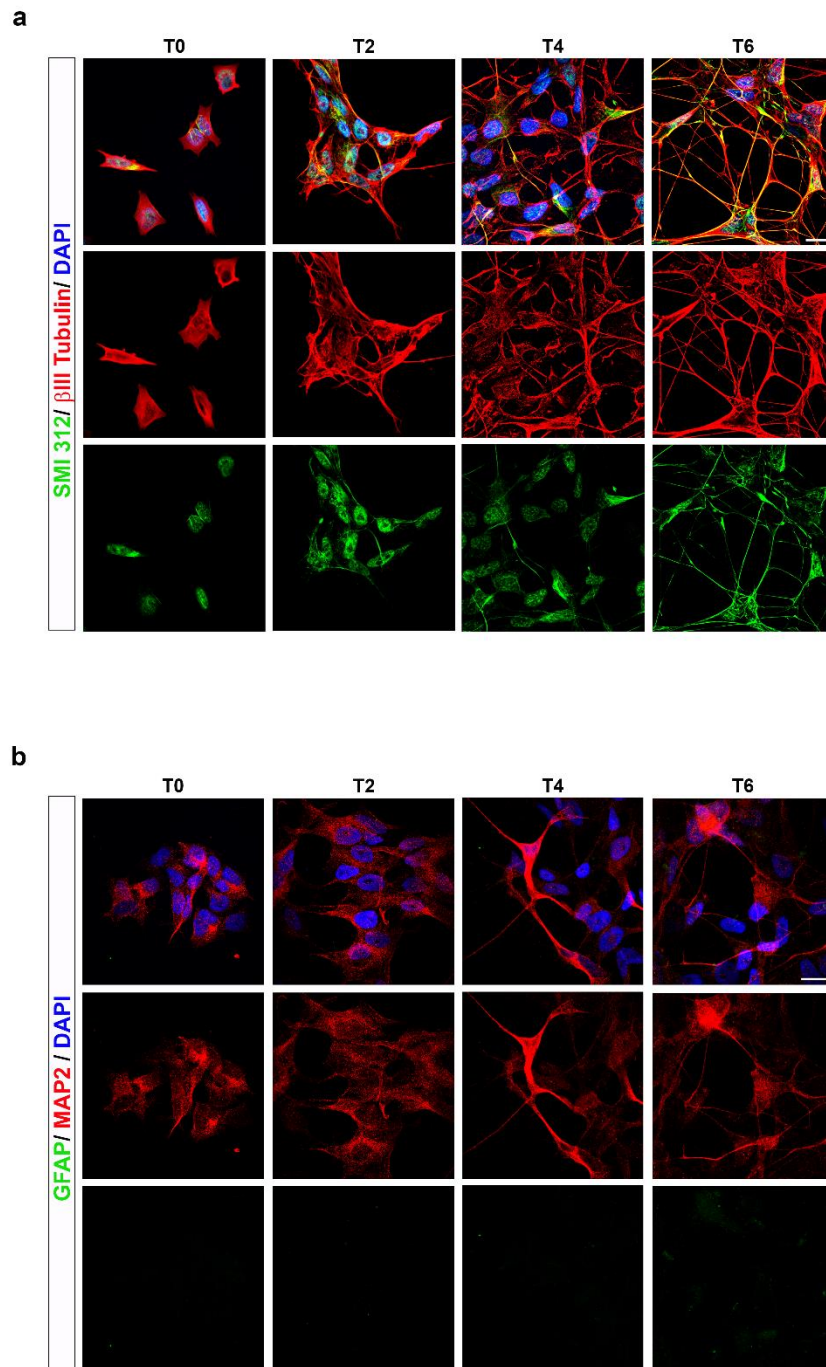

### Characterization of neuronal differentiation of SK-N-BE cells with Retinoic acid.

Neuronal differentiation with Retinoic acid (10  $\mu$ M) was evaluated by IF analysis of **a**) the neuronal markers  $\beta$ III-Tubulin (red) and SMI 312 (green) and **b**) the neuronal MAP2 (red) and the astrocytes GFAP (green) markers. Nuclear staining is indicated in blue (DAPI) in all the merged images. Bar, 20 $\mu$ m.

**Supplementary Figure 3.**

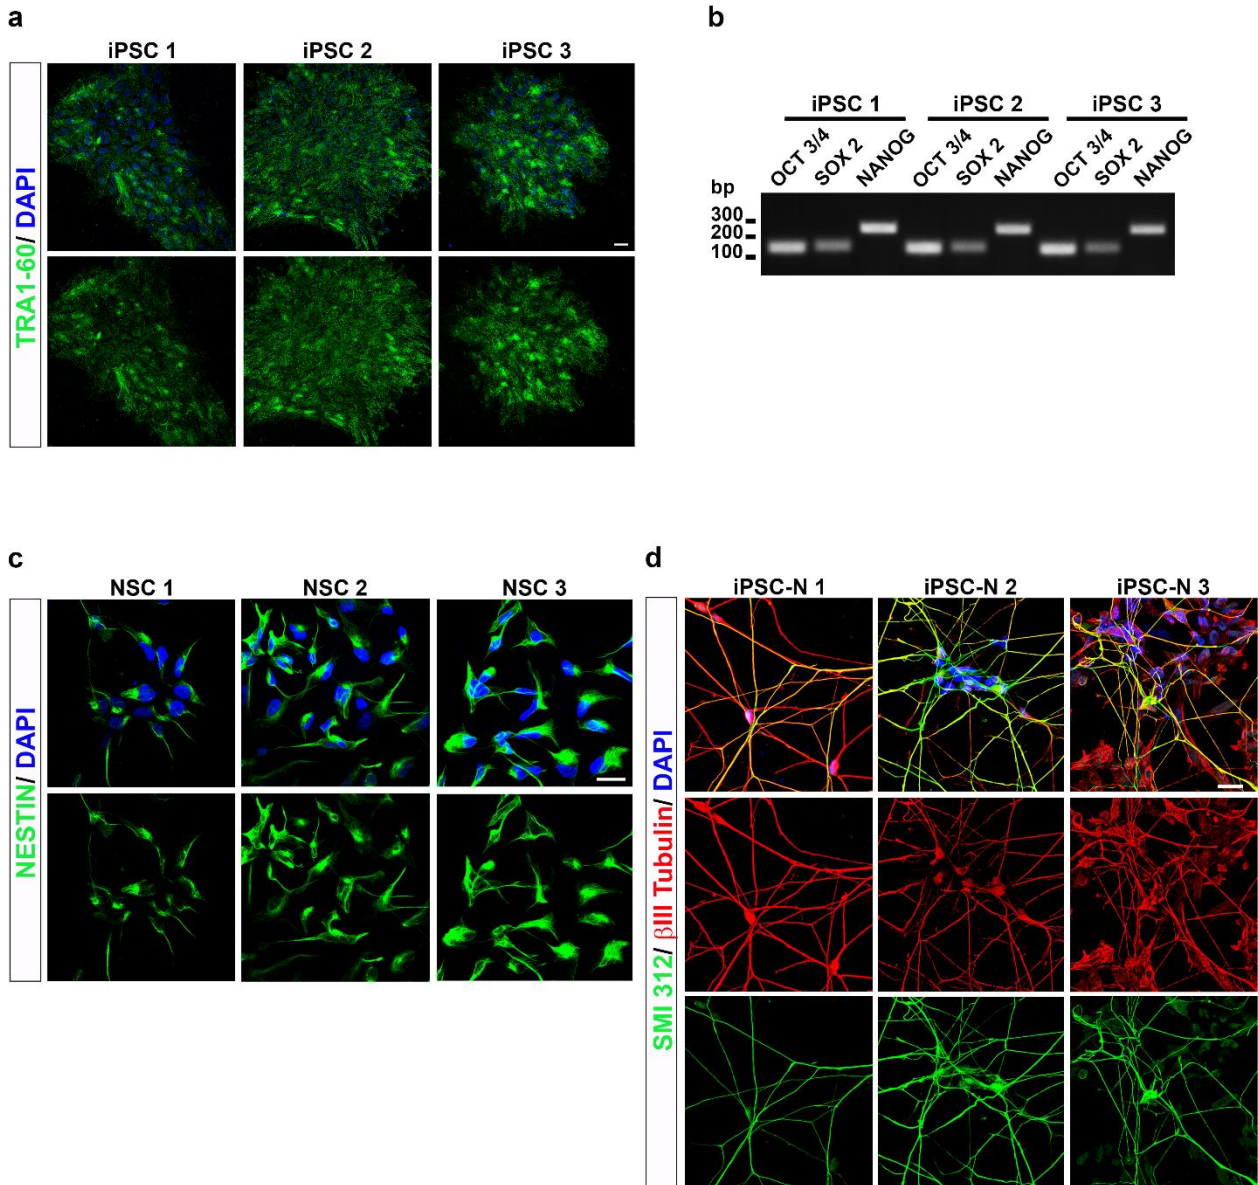

**Characterization of human iPSC, NSC and iPSC-derived neurons.**

Pluripotency of three human healthy iPSC lines was evaluated **a)** by IF analysis of TRA-1-60 (green) and **b)** by RT-PCR assay of *OCT 3/4*, *SOX 2* and *NANOG* stem cell markers. **c)** The three human healthy iPSC lines were differentiated into neural stem cells (NSC) and characterized for the Nestin marker (green) by IF analysis. **d)** The three iPSC lines were also differentiated into neurons (iPSC-N) and neuronal differentiation efficiency was evaluated by IF analysis with  $\beta$ III-Tubulin (red) and neurofilament SMI 312 (green) markers. Nuclear staining is indicated in blue (DAPI) in all the merged images. Bar, 20 $\mu$ m.

Supplementary Figure 4.

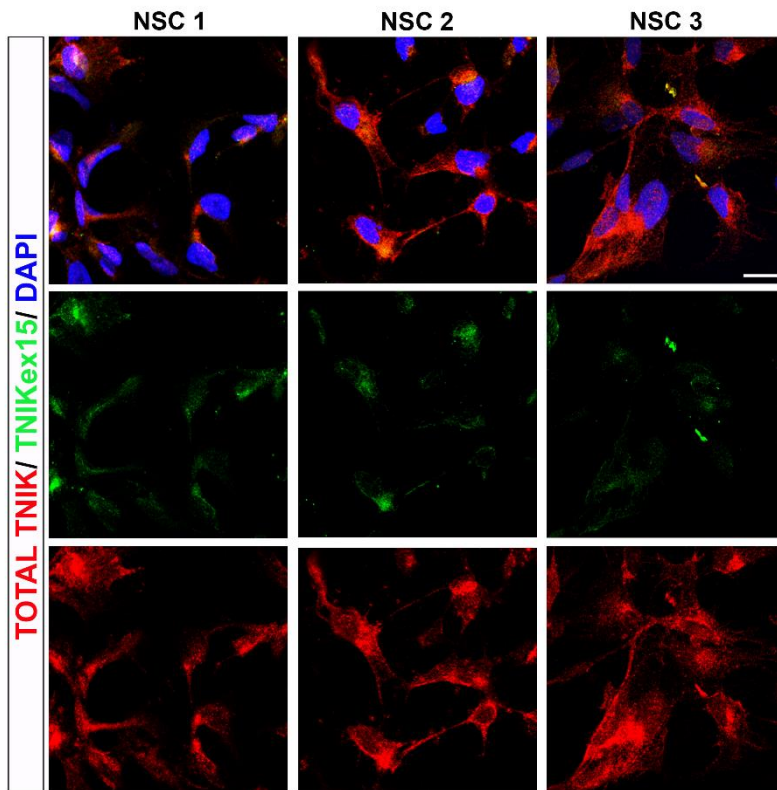

**TNIKex15 protein expression in NSC.**

Immunofluorescence images of TNIKex15 (green) and total TNIK proteins in the three neural stem cell lines (NSC) differentiated from three healthy iPSC lines. Nuclear staining is indicated in blue (DAPI) in the merged images. Bar, 20 $\mu$ m.

**Supplementary Figure 5.**

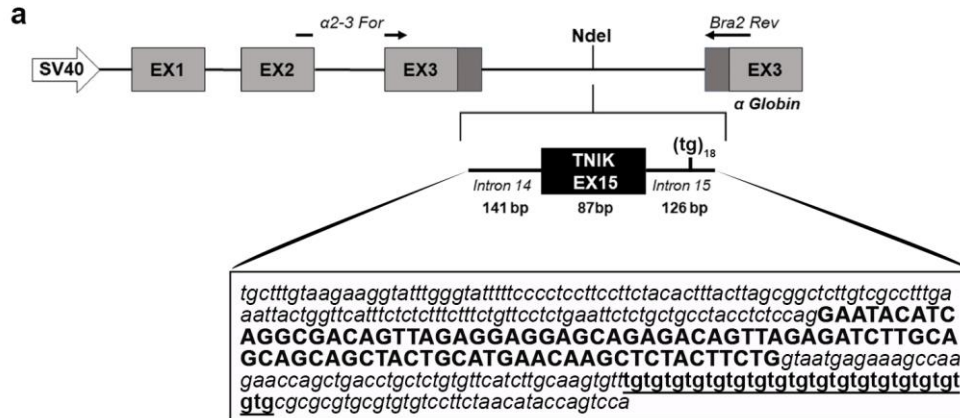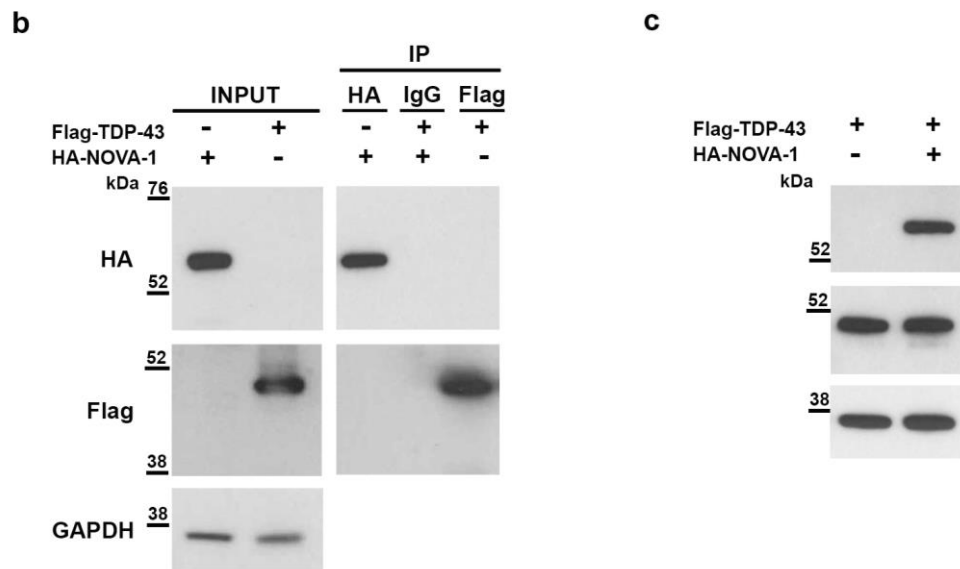

**TNIK minigene splicing and UV-CLIP assays.**

**a)** Schematic representation of the *TNIK* exon 15 minigene pTB construct as already described [12]. *TNIK* exon 15 (87bp) along with parts of 5' (141 bp) and 3' (126 bp) introns were subcloned into the NdeI restriction site of the pTB vector. The sequence of the subcloned region is reported in the box highlighting exon 15 sequence (capital letters) and the TDP-43 consensus binding motif TG<sub>18</sub> (underlined). The primers used for the RT-PCR are also indicated (α2-3 For; Bra2 Rev). **b)** Representative WB images to check the transfection efficiency (INPUT) in HEK293T lysates used for UV-CLIP assays showed in Figure 3d and to assess the recombinant HA-NOVA-1 and Flag-TDP-43 recovery in IP assays. GAPDH was used for sample normalization. **c)** Representative WB images to assess the transfection efficiency of HA-NOVA-1 and Flag-TDP-43 in HEK293T lysates used for UV-CLIP assays showed in Figure 3e. GAPDH was used for sample normalization.

**Supplementary Figure 6.**

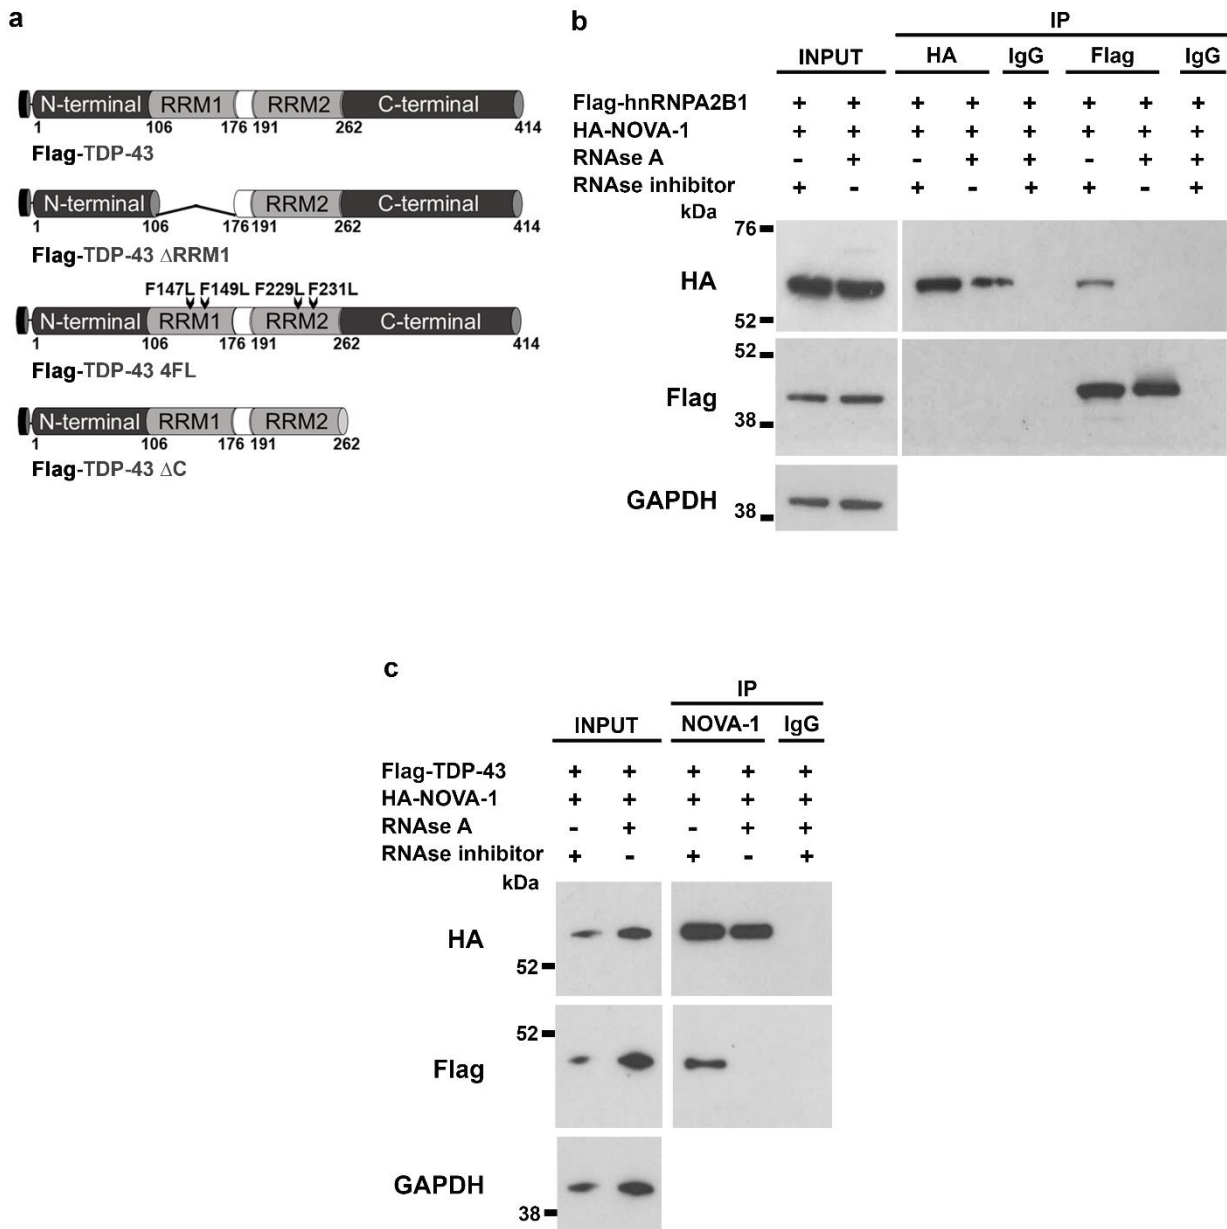

**NOVA-1 protein interaction with TDP-43 and hnRNPA2B1.**

**a)** Graphical representation of the Flag-tagged full-length and mutant TDP-43 constructs used in co-IP experiments showed in Figure 3g. **b)** Representative WB image of co-IP experiments using anti-Flag and anti-HA antibody to check for NOVA-1 binding to hnRNPA2B1. The irrelevant IgG antibody was used as negative control. HEK293T cells were co-transfected with Flag-hnRNPA2B1 and HA-NOVA-1 constructs and cell lysates treated with RNAseA or RNAse inhibitor to digest or preserve RNA respectively (n=3 independent experiments). GAPDH was used for sample normalization. **c)** Representative WB of co-IP experiments using anti-NOVA-1 antibody, recognizing a C-terminal epitope (315-537 aa) to check for NOVA-1 binding to TDP-43.

## Supplementary Figure 7.

**a**

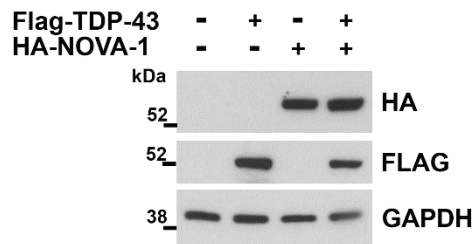

**b**

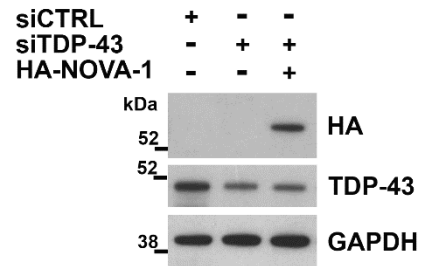

### Determination of recombinant NOVA1 expression and TDP-43 knock-down in HEK293T cells.

**a)** Representative WB images to assess HA-NOVA-1 and Flag-TDP-43 transfection efficiency in HEK293T cells used for RT-PCR assays showed in Figure 4a (n=4). **b)** Representative WB image to assess TDP-43 knock-down and HA-NOVA-1 transfection efficiency in HEK293T cells used for assays showed in Figure 4d (n=3).

**Supplementary Table S1. Description of the total RNA samples from different human adult tissues (Clontech)**

Catalogue and lot numbers are reported together with the number of individuals included in each RNA set

| Tissue            | Cat./Lot Number | Sample features                                |
|-------------------|-----------------|------------------------------------------------|
| Total brain       | 636530/1602002  | 3 male Asians, ages: 21-29                     |
| Total spinal cord | 636554/1402006  | male/female Asians and Caucasians, ages: 23-72 |
| Skeletal muscle   | 636534/1611352A | Caucasian male, age: 20                        |
| Testis            | 636533/1402004  | 7 Asians and Caucasians, ages: 24-87           |
| Kidney            | 636529/1508373A | Caucasian female; age: 40                      |
| Liver             | 636531/1402003  | 3 Asian males, ages: 24-64                     |
| Lung              | 636524/1508369A | 3 male/female Caucasians, ages: 32-61          |

**Supplementary Table S2. List of primer sequences used in RT-PCR and Q-PCR assays**

The amplicon length is reported and also the Q-PCR efficiency calculated on 5 serial dilutions

| Gene               | Foward primer               | Reverse primer             | Ref | Assay  | Size (bp) | Efficiency (%) |
|--------------------|-----------------------------|----------------------------|-----|--------|-----------|----------------|
| <i>TNIK(ex15)</i>  | CAAAGGCGAGAGAAGGAGCTG       | CTGATGCTGAAGGGAATAAG       | 12  | RT-PCR | 294/207   | -              |
| <i>TNIK(ex17)</i>  | CTTCAGCATCAGCGCAGGAGC       | ACTGACTGGGAGGCGGTCAAG      | -   | RT-PCR | 326/161   | -              |
| <i>TNIK(ex22)</i>  | CAGAAGAATCCAGGGACATTAC      | CACCTTCTTCATTGGGCGGTTTG    | -   | RT-PCR | 137/113   | -              |
| <i>RPL10a</i>      | CAAGAAGCTGGCCAAGAAGTATG     | TCTGTCATCTTCACGTGAC        | -   | RT-PCR | 228       | -              |
| <i>GAPDH</i>       | TCCCCACTGCCAACGTGTCAGTG     | ACCCTGTTGCTGTAGCCAAATTCG   | 12  | RT-PCR | 264       | -              |
| <i>MINIGENE</i>    | CAACTTCAAGCTCCTAAGCCACTGC   | GGTCACCAGGAAGTTGGTTAAATCA  | 12  | RT-PCR | 334/247   | -              |
| <i>OCT3/4</i>      | GACAGGGGGAGGGGAGGAGCTAGG    | CTTCCCTCCAACCAAGTTGCCCAAAC | 42  | RT-PCR | 144       | -              |
| <i>SOX2</i>        | TTGCGTGAGTGTGGATGGGATTGGTG  | GGGAAATGGGAGGGGTGCAAAGAGG  | 42  | RT-PCR | 151       | -              |
| <i>NANOG</i>       | CAGCCCTGATTCTCCACCACTCC     | GTTCTGGAACCAAGTCTTCACCTG   | 42  | RT-PCR | 244       | -              |
| <i>POLDIP3</i>     | CCTTCATAAACCCACCCATTGGGACAG | GTGGTGGAGAAAGCCGCCTGAG     | 12  | RT-PCR | 293/155   | -              |
| <i>STAG2</i>       | GTATGTTTACTTGGAAGTTTCATG    | TGATTCATCCATAATTGAAGCTGGA  | 31  | RT-PCR | 730/619   | -              |
| <i>TNIK(ex15)</i>  | AATACATCAGGCGACAGTTAG       | GCTTATATTCCAGAAGTAGAGCT    | -   | Q-PCR  | 96        | 122,38         |
| <i>TNIK(Total)</i> | ACATACCATCTCATATTCAGGGC     | CATTCCATCTGTTTTAGGCAAGA    | -   | Q-PCR  | 71        | 100,22         |
| <i>RPL10a</i>      | GAAGAAGGTGTTATGTCTGG        | TCTGTCATCTTCACGTGAC        | 12  | Q-PCR  | 51        | 97,95          |



**Supplementary Table S3. List of primary antibodies used for immunofluorescence (IF), Western blot (WB) and immunoprecipitation (IP) assays.**

| <b>Antibody (dilution)</b>         | <b>Cat. Number (Company)</b>         | <b>Assay</b> |
|------------------------------------|--------------------------------------|--------------|
| βIII Tubulin (1:800)               | ab52623 (Abcam)                      | IF           |
| TNIK exon 15 (1:500)               | home-made (mouse)                    | IF           |
| TRA1-60 (1:500)                    | 14-8863-80 (Invitrogen)              | IF           |
| NESTIN (1:200)                     | MAB5326 (Chemicon)                   | IF           |
| GFAP (1:50)                        | sc-33673 (Santa Cruz)                | IF           |
| MAP2 (1:200)                       | Ab32454 (Abcam)                      | IF           |
| SMI 312 (1:700)                    | SMI-312R (Covance)                   | IF           |
| TNIK (1:500)                       | GTX13141 (Gene Tex)                  | IF           |
| HA (1:200)                         | H6908 (Sigma-Aldrich)                | IF/IP        |
| Alexa Fluor 546 Phalloidin (1:500) | A22283 (Thermo Fisher Scientific)    | IF           |
| TDP-43 (1:1000)                    | 10782-2-AP (Protein Tech)            | WB           |
| NOVA-1 (1:1000)                    | PA5-21459 (Thermo Fisher Scientific) | WB/IP        |
| FLAG (1:1000)                      | F3165 (Sigma-Aldrich)                | WB/IP        |
| GAPDH (1:1000)                     | sc-47724 (Santa Cruz)                | WB           |
| HA-Peroxidase (HRP) (1:10000)      | 130-091-972 (Miltenyi biotec)        | WB           |
| FLAG-Peroxidase (HRP) (1:1000)     | A8592 (Sigma-Aldrich)                | WB           |
| hnRNPA2B1 (1:500)                  | sc-32316 (Santa Cruz)                | WB           |
| α Tubulin (1:500)                  | sc-8035 (Santa Cruz)                 | WB           |

**Supplementary Table S4. Summary of experimental data and statistical analyses.**

|                 | Number of replicates                                                                                                                                                                                | Mean±SEM                                                                                                                     | Statistical Test                                 | Post hoc test |
|-----------------|-----------------------------------------------------------------------------------------------------------------------------------------------------------------------------------------------------|------------------------------------------------------------------------------------------------------------------------------|--------------------------------------------------|---------------|
| <b>Figure 1</b> |                                                                                                                                                                                                     |                                                                                                                              |                                                  |               |
| <b>1e</b>       | T0 : 3<br>T2 : 3<br>T4 : 3<br>T6 : 3                                                                                                                                                                | 12.22%±2.42%<br>14.76%±1.09%<br>18.71%±3.25%<br>23.2%±4.65%                                                                  | one way-ANOVA<br>(F: 2.35 df: 11)                | Tukey         |
| <b>1f</b>       | T0 : 4<br>T2 : 4<br>T4 : 4<br>T6 : 4                                                                                                                                                                | 0.90±0.20<br>2.36±0.33<br>4.87±0.50<br>5.08±0.61                                                                             | one way-ANOVA<br>(F: 21.05 df: 15)               | Tukey         |
| <b>1g</b>       | T0 : 4<br>T2 : 4<br>T4 : 4<br>T6 : 4                                                                                                                                                                | 1.01±0.12<br>2.11±0.29<br>4.94±0.48<br>6.55±1.27                                                                             | one way-ANOVA<br>(F: 13.28 df: 15)               | Tukey         |
| <b>1i</b>       | iPSCs : 3<br>NSCs : 3<br>iPSC-Neurons : 3                                                                                                                                                           | 5.80%±1.30%<br>25.04%±3.94%<br>50.07%±3.90%                                                                                  | one way-ANOVA<br>(F: 45.63 df: 8)                | Tukey         |
| <b>1l</b>       | iPSCs : 3<br>NSCs : 3<br>iPSC-Neurons : 3                                                                                                                                                           | 1.03± 0.17<br>0.99±0.061<br>2.79±0.86                                                                                        | one way-ANOVA<br>(F: 4.12 df: 8)                 | Tukey         |
| <b>Figure 2</b> |                                                                                                                                                                                                     |                                                                                                                              |                                                  |               |
| <b>2b</b>       | T0 : 4<br>T2 : 4<br>T4 : 4<br>T6 : 4                                                                                                                                                                | 1.06±0.10<br>1.17±0.14<br>1.04±0.13<br>1.08±0.19                                                                             | one way-ANOVA<br>(F: 0.15 df: 15)                | Tukey         |
| <b>2c</b>       | T0 : 4<br>T2 : 4<br>T4 : 4<br>T6 : 4                                                                                                                                                                | 0.92±0.14<br>1.11±0.10<br>0.98±0.09<br>1.62±0.21                                                                             | one way-ANOVA<br>(F: 4.83 df: 15)                | Tukey         |
| <b>2e</b>       | iPSCs : 3<br>NSCs : 3<br>iPSC-Neurons : 3                                                                                                                                                           | 1.00±0.25<br>0.83±0.19<br>0.92±0.26                                                                                          | one way-ANOVA<br>(F: 0.13 df: 8)                 | Tukey         |
| <b>2f</b>       | iPSCs : 3<br>NSCs : 3<br>iPSC-Neurons : 3                                                                                                                                                           | 1.00±0.34<br>1.31±0.30<br>5.25±0.57                                                                                          | one way-ANOVA<br>(F: 31.44 df: 8)                | Tukey         |
| <b>2h</b>       | pcDNA : 3<br>HA-NOVA-1 : 3                                                                                                                                                                          | 4.36%±0.59%<br>17.42%±5.72%                                                                                                  | One-tailed<br>Unpaired t Test<br>(t: 2.27 df: 4) | -             |
| <b>2i</b>       | pcDNA : 3<br>HA-NOVA-1 : 3                                                                                                                                                                          | 1.00±0.05<br>0.75±0.05                                                                                                       | One-tailed<br>Unpaired t Test<br>(t: 3.18 df: 4) | -             |
| <b>2l</b>       | pcDNA : 3<br>HA-NOVA-1 : 3                                                                                                                                                                          | 1.00±0.11<br>1.02±0.09                                                                                                       | One-tailed<br>Unpaired t Test<br>(t: 0,13 df: 4) | -             |
| <b>Figure 3</b> |                                                                                                                                                                                                     |                                                                                                                              |                                                  |               |
| <b>3b</b>       | pcDNA : 3<br>Flag-TDP-43 : 3<br>HA-NOVA1 : 3<br>Flag-hnRNPA2B1 : 3<br>HA-NOVA-1 + Flag-TDP-43 : 3<br>HA-NOVA-1 + Flag-hnRNPA2B1 : 3<br>Flag-TDP-43 + Flag-hnRNPA2B1 : 3<br>HA-NOVA-1+ Flag-TDP-43 + | 88.19%±5.83%<br>53.47%±7.51%<br>92.15%±4.49%<br>68.82%±8.75%<br>90.80%±3.80%<br>92.77%±3.81%<br>32.62%±3.94%<br>93.54%±1.78% | one way-ANOVA<br>(F: 17.82 df: 23)               | Tukey         |

|                 |                                                                                                                                      |                                                              |                                    |       |
|-----------------|--------------------------------------------------------------------------------------------------------------------------------------|--------------------------------------------------------------|------------------------------------|-------|
|                 | Flag-hnRNP2B1: 3                                                                                                                     |                                                              |                                    |       |
| <b>Figure 4</b> |                                                                                                                                      |                                                              |                                    |       |
| <b>4b</b>       | pcDNA : 4<br>Flag-TDP-43 : 4<br>HA-NOVA1 : 4<br>HA-NOVA-1 + Flag-TDP-43 : 4                                                          | 12.81%±0.66%<br>14.92%±1.76%<br>28.37%±2.30%<br>27.88%±4.09% | one way-ANOVA<br>(F: 10.73 df: 15) | Tukey |
| <b>4c</b>       | pcDNA : 3<br>Flag-TDP-43 : 3<br>HA-NOVA1 : 3<br>HA-NOVA-1 + Flag-TDP-43 : 3                                                          | 26.00%±1.22%<br>27.10%±0.99%<br>53.85%±2.23%<br>51.61%±2.13% | one way-ANOVA<br>(F: 76.33 df: 11) | Tukey |
|                 | pcDNA : 3<br>Flag-TDP-43 : 3<br>HA-NOVA1 : 3<br>HA-NOVA-1 + Flag-TDP-43 : 3                                                          | 21.83%±2.74%<br>21.67%±2.42%<br>32.32%±1.82%<br>30.93%±1.73% | one way-ANOVA<br>(F: 6.68 df: 11)  | Tukey |
| <b>4e</b>       | siCTRL : 3<br>siTDP-43 : 3<br>siTDP-43+HA-NOVA1 : 3                                                                                  | 22.69%±1.03%<br>32.68%±0.21%<br>41.62%±1.46%                 | one way-ANOVA<br>(F: 101.6 df: 8)  | Tukey |
| <b>4f</b>       | siCTRL : 3<br>siTDP-43 : 3<br>siTDP-43+HA-NOVA1 : 3                                                                                  | 21.70%±4.02%<br>54.65%±5.71%<br>67.41%±0.76%                 | one way-ANOVA<br>(F: 33.82 df: 8)  | Tukey |
|                 | siCTRL : 3<br>siTDP-43 : 3<br>siTDP-43+HA-NOVA1 : 3                                                                                  | 27.66%±1.30%<br>41.47%±4.02%<br>45.59%±1.84%                 | one way-ANOVA<br>(F: 12.47 df: 8)  | Tukey |
| <b>Figure 5</b> |                                                                                                                                      |                                                              |                                    |       |
| <b>5a</b>       | pcDNA + GFP : 3 (75 cells)<br>HA-TNIKex15 + GFP : 3 (75 cells)<br>HATNIK Δ15 + GFP : 3 (75 cells)<br>HA-TNIK KM + GFP : 3 (75 cells) | 0.31±0.02<br>0.55±0.02<br>0.38±0.02<br>0.27±0.02             | Kruskal-Wallis<br>(KW stat: 81.41) | Dunn  |
| <b>Figure 6</b> |                                                                                                                                      |                                                              |                                    |       |
| <b>6c</b>       | pcDNA + GFP : 4 (72 cells)<br>HA-TNIKex15 + GFP : 4 (59 cells)<br>HATNIK Δ15 + GFP : 4 (72 cells)<br>HA-TNIK KM + GFP : 4 (59 cells) | 10.24±0.36<br>8.40±0.41<br>9.93±0.44<br>10.75±0.45           | Kruskal-Wallis<br>(KW stat: 14.01) | Dunn  |
| <b>6e</b>       | pcDNA + GFP : 4 (65 cells)<br>HA-TNIKex15 + GFP : 4 (45 cells)<br>HATNIK Δ15 + GFP : 4 (65 cells)<br>HA-TNIK KM + GFP : 4 (38 cells) | 1.05±0.11<br>0.60±0.07<br>0.90±0.08<br>0.87±0.14             | Kruskal-Wallis<br>(KW stat: 10.81) | Dunn  |
| <b>6f</b>       | pcDNA + GFP : 4 (65 cells)<br>HA-TNIKex15 + GFP : 4 (45 cells)<br>HATNIK Δ15 + GFP : 4 (65 cells)<br>HA-TNIK KM + GFP : 4 (38 cells) | 2.29±0.21<br>1.35±0.16<br>2.18±0.19<br>1.93±0.19             | Kruskal-Wallis<br>(KW stat: 11.31) | Dunn  |
| <b>6g</b>       | pcDNA + GFP : 4 (65 cells)<br>HA-TNIKex15 + GFP : 4 (45 cells)<br>HATNIK Δ15 + GFP : 4 (65 cells)<br>HA-TNIK KM + GFP : 4 (38 cells) | 10.78±1.12<br>9.27±0.7<br>12.04±0.95<br>8.49±0.81            | Kruskal-Wallis<br>(KW stat: 6.78)  | Dunn  |
| <b>6i</b>       | pcDNA + GFP : 4 (46 cells)<br>HA-TNIKex15 + GFP : 4 (35 cells)<br>HATNIK Δ15 + GFP : 4 (46 cells)<br>HA-TNIK KM + GFP : 4 (42 cells) | 1.06±0.11<br>0.83±0.13<br>1.06±0.12<br>2.26±0.24             | Kruskal-Wallis<br>(KW stat: 27.70) | Dunn  |
| <b>6l</b>       | pcDNA + GFP : 4 (46 cells)<br>HA-TNIKex15 + GFP : 4 (35 cells)<br>HATNIK Δ15 + GFP : 4 (46 cells)<br>HA-TNIK KM + GFP : 4 (42 cells) | 283.30±17.78<br>200.10±9.69<br>238.50±11.22<br>240.4±12.14   | Kruskal-Wallis<br>(KW stat: 13.91) | Dunn  |
